# Supplementary material for: Nitrogen-doped carbons derived from cotton pulp for improved supercapacitors
Source: Royal Society of Chemistry journal article supplement (doi:10.1039/d2ra02850f), 2022-01-01
Supplement: d2ra02850f1.pdf [file d2ra02850f1.pdf]

## Supporting Information

### **Nitrogen doping carbons derived from cotton pulp for outperformed supercapacitor**

Jian Shen<sup>1\*</sup>, Jiangbin Yu<sup>1</sup>, Hao Luo<sup>1</sup>, Xiang Liu<sup>2\*</sup>, Qiongzhi Zhou<sup>1</sup>, Tianxiang Wei<sup>1</sup>, Xinyi Yu<sup>1</sup>, Yahui Wu<sup>1</sup>, Yifei Yu<sup>1</sup>, Mingjie Li<sup>3\*</sup>

<sup>1</sup> *College of Environment and Resources, Xiangtan University, Xiangtan 411105, China*

<sup>2</sup> *National Key Laboratory of Human Factors Engineering, Chinese astronaut research and training center, Beijing 100094, China*

<sup>3</sup> *Group of Biomimetic Smart Materials, CAS Key Laboratory of Bio-based Materials, Qingdao Institute of Bioenergy and Bioprocess Technology, Chinese Academy of Sciences, Songling Road 189, Qingdao 266101, P. R. China*

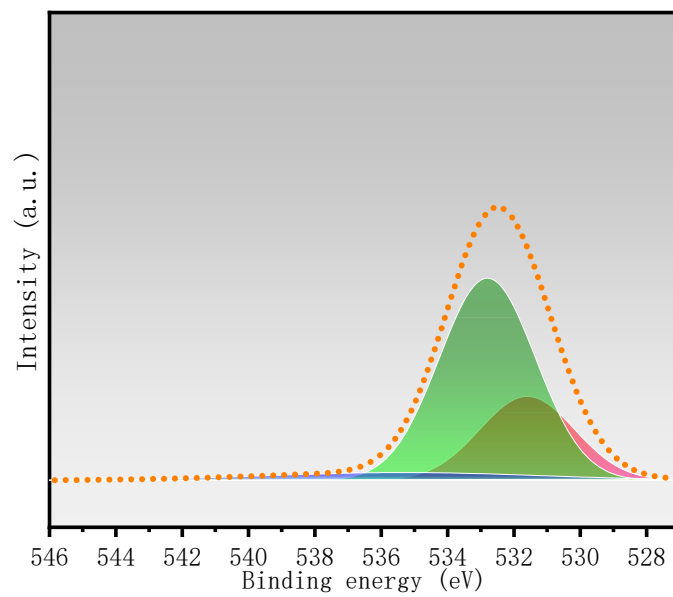

**Figure S1** O1s XPS spectrum of CCP

**Table S1.** Textural properties for the various porous carbon materials utilized in this work

| Sample | Specific surface area<br>(m <sup>2</sup> /g) | Pore volume<br>(cc/g) | Average pore size<br>(nm) |
|--------|----------------------------------------------|-----------------------|---------------------------|
| CCP    | 30.593                                       | 0.030                 | 18.659                    |
| CCPN1  | 351.811                                      | 0.032                 | 18.659                    |
| CCPN2  | 252.565                                      | 0.038                 | 18.45                     |

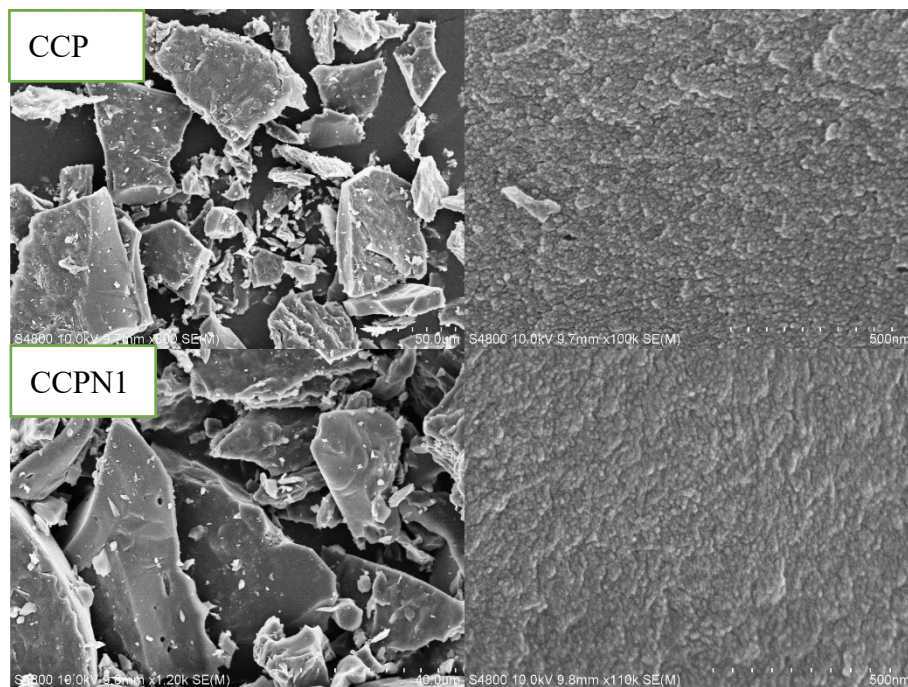

**Figure S2.** SEM images of pure CCP and nitrogen doping CCP

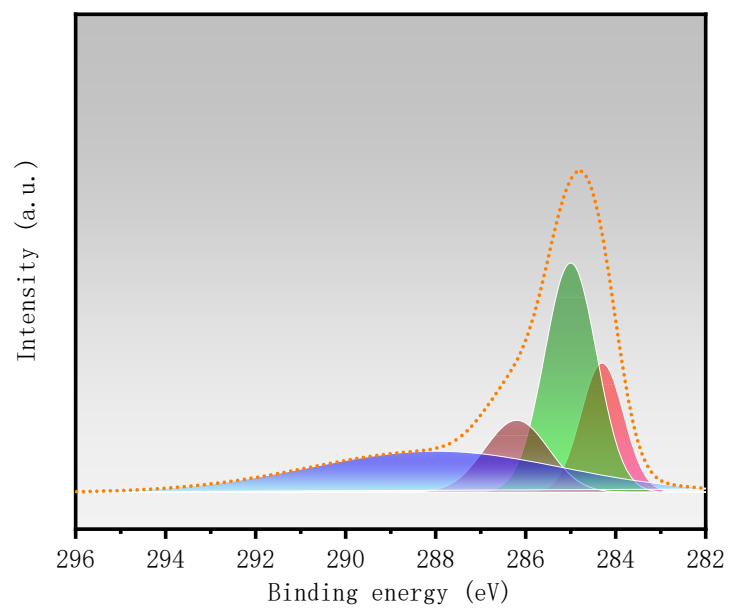

**Figure S3.** C1s XPS spectrum of CCP

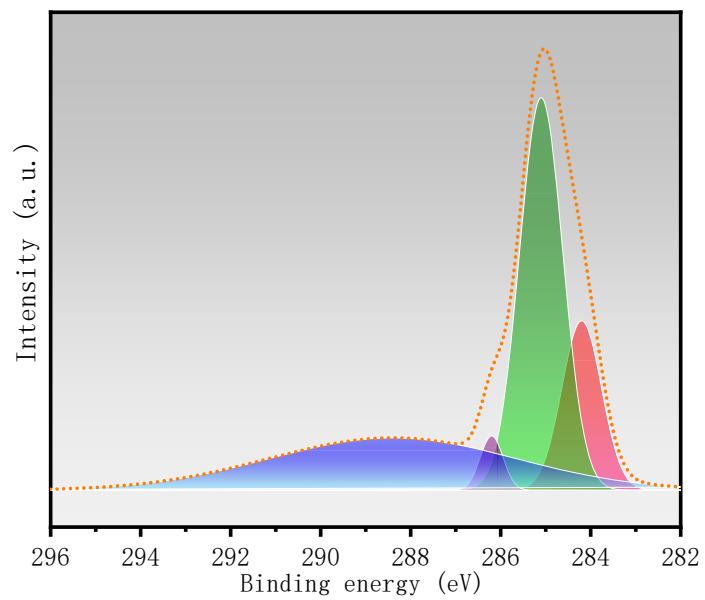

**Figure S4.** C1s XPS spectrum of CCPN2

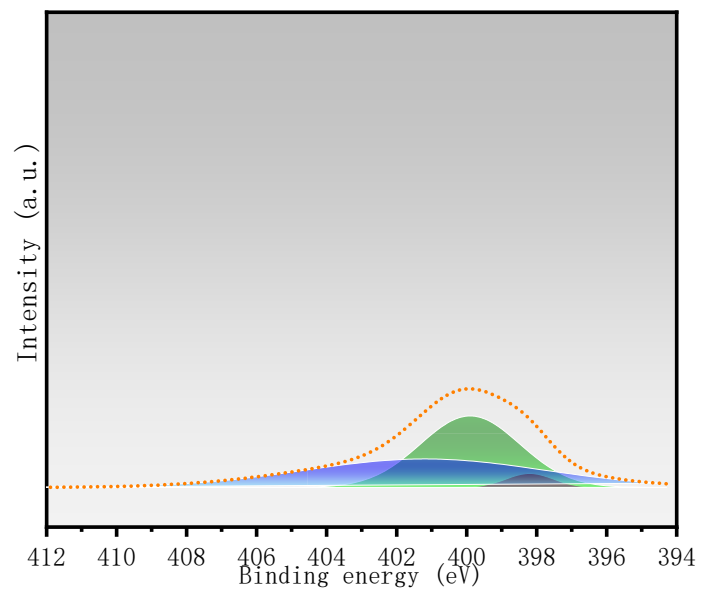

**Figure S5.** N1s XPS spectrum of CCP

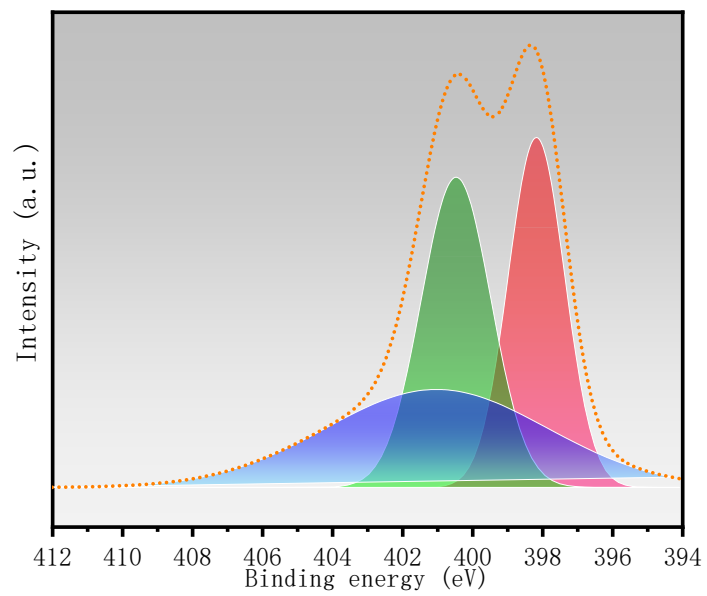

**Figure S6.** N1s XPS spectrum of CCPN2



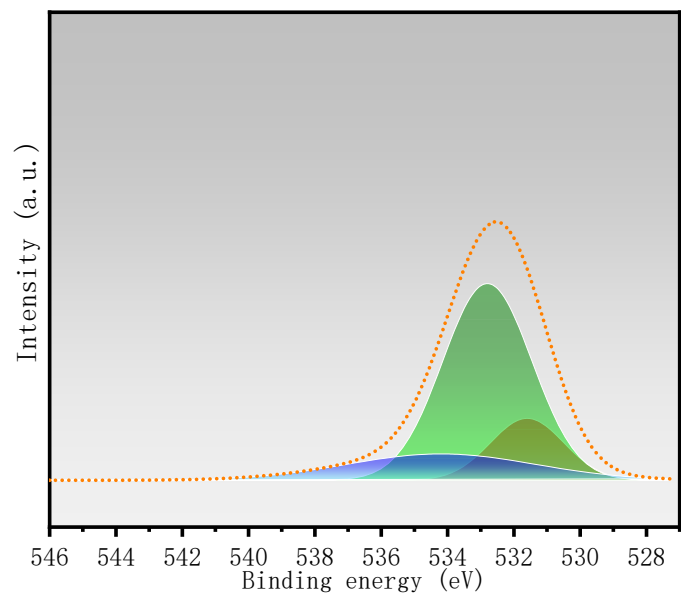

**Figure S7.** O1s XPS spectrum of CCPN2

**Table S2.** C, N, and O element atomic ratio in CCP, CCPN1, and CCPN2

| Sample | C (Atomic %) | N (Atomic %) | O (Atomic %) |
|--------|--------------|--------------|--------------|
| CCP    | 90.38        | 3.18         | 6.44         |
| CCPN1  | 84.35        | 5.64         | 10.01        |
| CCPN2  | 81.49        | 11.68        | 6.83         |

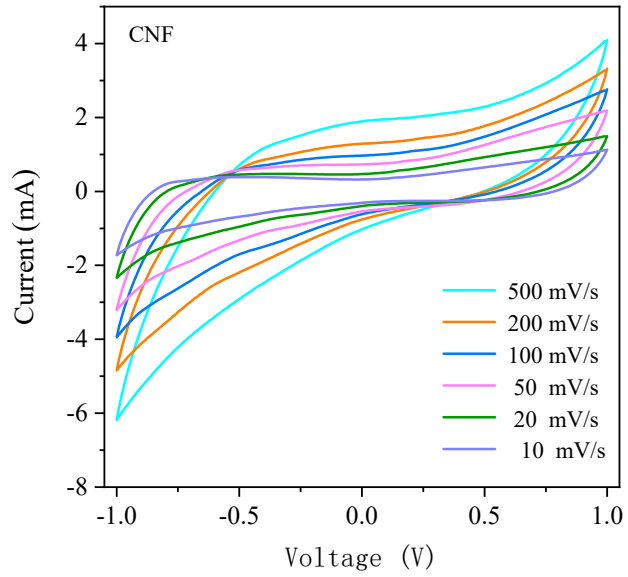

**Figure S8.** Cyclic voltammograms of CCP in 0.1 M NaCl solution scanning from 1.0 to -1.0V vs Ag/AgCl under different scan rate

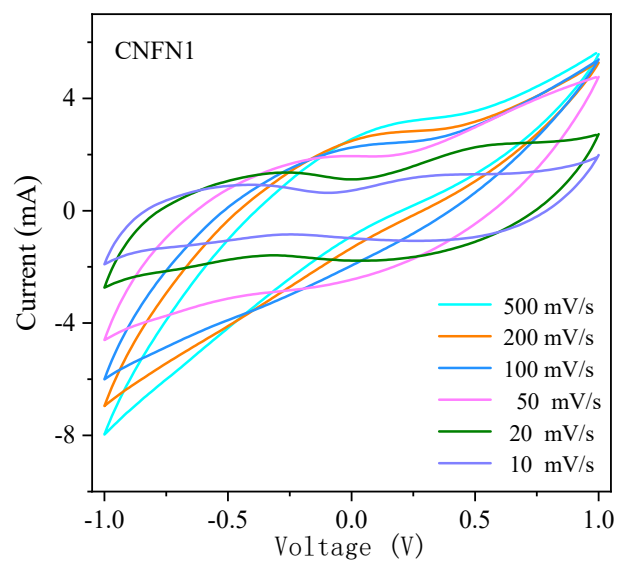

**Figure S9.** Cyclic voltammograms of CCPN1 in 0.1 M NaCl solution scanning from 1.0 to -1.0V vs Ag/AgCl under different scan rate

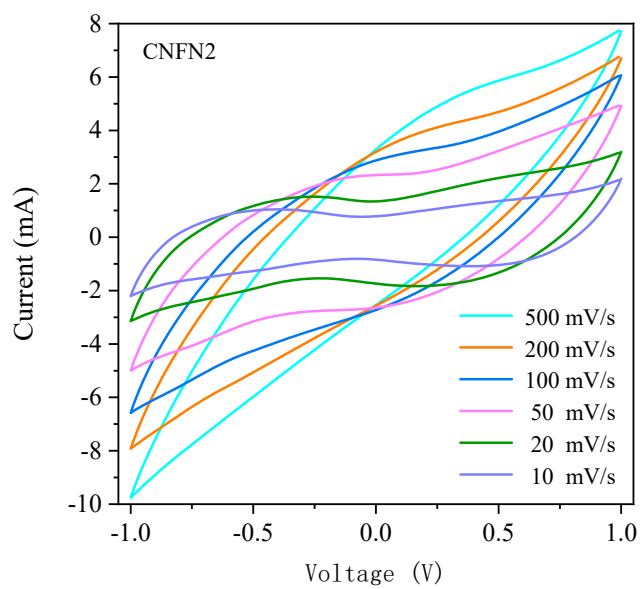

**Figure S10.** Cyclic voltammograms of CCPN2 in 0.1 M NaCl solution scanning from 1.0 to -1.0V vs Ag/AgCl under different scan rate

**Table S3.** Comparison of electrochemical performance of CNFN1 with other different materials

| Materials                       | Specific capacitance (F/g) | Current density                    | Cycling stability                                                                 | Electrolyte                 | Ref. |
|---------------------------------|----------------------------|------------------------------------|-----------------------------------------------------------------------------------|-----------------------------|------|
| Porous carbon nanofiber         | 140.80                     | $0.50\text{A}\cdot\text{g}^{-1}$   | 95.4% capacity retention after 10000 cycles at $10\text{A}\cdot\text{g}^{-1}$     | 6 M KOH                     | 1    |
| $\text{RuO}_2\text{-CNF}(220)$  | 188.00                     | $1.00\text{mA}\cdot\text{cm}^{-2}$ | 93% capacity retention after 3000 cycles at $1.00\text{mA}\cdot\text{cm}^{-2}$    | 6 M KOH                     | 2    |
| CNFs/3DGN                       | 59.28                      | $0.17\text{mA}\cdot\text{cm}^{-2}$ | 93% capacity retention after 10000 cycles at $0.17\text{mA}\cdot\text{cm}^{-2}$   | 6 M KOH                     | 3    |
| CNFs                            | 80.00                      | $0.30\text{A}\cdot\text{g}^{-1}$   | 100% capacity retention after 2000 cycles at $1.5\text{A}\cdot\text{g}^{-1}$      | 6 M KOH                     | 4    |
| $\text{NiCoeBH41@TiC/CNF}$      | 2224.00                    | $0.50\text{A}\cdot\text{g}^{-1}$   | 91% capacity retention after 3000 cycles at $5.0\text{A}\cdot\text{g}^{-1}$       | 6 M KOH                     | 5    |
| E-CNFs                          | 320.20                     | $20.00\text{A}\cdot\text{g}^{-1}$  | 94.5 % capacity retention after 5000 cycles at $1.0\text{A}\cdot\text{g}^{-1}$    | 6 M KOH                     | 6    |
| $\text{NiO/C@CNF}$              | 742.20                     | $1.00\text{A}\cdot\text{g}^{-1}$   | 88 % capacity retention after 5000 cycles at $2.0\text{A}\cdot\text{g}^{-1}$      | 3 M KOH                     | 7    |
| $\text{CNF/MnFe}_2\text{O}_4$   | 291.87                     | $5.00\text{A}\cdot\text{g}^{-1}$   | Over 80 % capacity retention after 1000 cycles at $5.0\text{A}\cdot\text{g}^{-1}$ | 2 M KOH                     | 8    |
| $\text{Co}_2\text{P@N\&P-CNFs}$ | 475.80                     | $0.50\text{A}\cdot\text{g}^{-1}$   | 91.5 % capacity retention after 10000 cycles at $0.3\text{A}\cdot\text{g}^{-1}$   | 1 M KOH                     | 9    |
| $\text{N(Ni)-CNF(S)}$           | 203.40                     | $1.00\text{A}\cdot\text{g}^{-1}$   | 94 % capacity retention after 10000 cycles at $1.0\text{A}\cdot\text{g}^{-1}$     | 1 M KOH                     | 10   |
| $\text{Ni-G-CNFs@PANI}$         | 318.00                     | $0.50\text{A}\cdot\text{g}^{-1}$   | 85.8 % capacity retention after 1000 cycles at $10\text{A}\cdot\text{g}^{-1}$     | 1 M $\text{H}_2\text{SO}_4$ | 11   |
| $\text{N(11 wt \%)-CNFs}$       | 495.00                     | $0.50\text{A}\cdot\text{g}^{-1}$   | 94 % capacity retention after 10000 cycles at $1.0\text{A}\cdot\text{g}^{-1}$     | 1 M $\text{H}_2\text{SO}_4$ | 12   |

|                                               |               |                             |                                                                                |                                       |                  |
|-----------------------------------------------|---------------|-----------------------------|--------------------------------------------------------------------------------|---------------------------------------|------------------|
| PANi/CNF                                      | 493.75        | 1.00 mA·cm <sup>-2</sup>    | 94.3 % capacity retention after 5000 cycles at 1.00 mA·cm <sup>-2</sup>        | 1 M H <sub>2</sub> SO <sub>4</sub>    | 13               |
| 3D N-CNFs/V <sub>2</sub> O <sub>5</sub>       | 595.10        | 0.5A·g <sup>-1</sup>        | 100 % capacity retention after 12000 cycles at 0.5A·g <sup>-1</sup>            | 1 M Na <sub>2</sub> SO <sub>4</sub>   | 14               |
| CSS-based graphite / PEDOT / MnO <sub>2</sub> | 195.70        | 0.50A·g <sup>-1</sup>       | 81 % capacity retention after 2000 cycles at 0.5A·g <sup>-1</sup>              | 0.5 M Na <sub>2</sub> SO <sub>4</sub> | 15               |
| Hierarchically porous carbons                 | 383           | 10 mV·s <sup>-1</sup>       | 72% capacity retention after 10000 cycles at 1 A·g <sup>-1</sup>               | 1 M KOH                               | 16               |
| <b>CCPN1</b>                                  | <b>642.50</b> | <b>0.50A·g<sup>-1</sup></b> | <b>Over 150 F/g capacity retention after 5000 cycles at 2 A·g<sup>-1</sup></b> | <b>0.1 M NaCl</b>                     | <b>This work</b> |

## References

- [1] He, G.; Song, Y.; Chen, S.; Wang, Li. Porous carbon nanofiber mats from electrospun polyacrylonitrile/polymethylmethacrylate composite nanofibers for supercapacitor electrode materials. *J. Mater. Sci.* **2018**, 53, 1–10.
- [2] Jeon, S.; Jeong, J. H.; Yoo, H.; Yu, K. H.; Kim, B. H.; Kim, M. H. RuO<sub>2</sub> nanorods on electrospun carbon nanofibers for supercapacitors. *ACS Appl. Nano Mater.* **2020**, 3, 3847–3858
- [3] Lin, C. H.; Tsai, C.H.; Tseng, F. G.; Chen, I. C.; Hsieh, C. K. Electrochemical pulse deposition of Ni nanoparticles on the 3D graphene network to synthesize vertical CNFs as the full-carbon hybrid nanoarchitecture for supercapacitors. *Mater. Lett.* **2017**, 192,40–43.
- [4] Daraghmeh, A.; Hussain, S.; Servera, L.; Xuriguera, E.; Cornet, A.; Cirera, A. Impact of binder concentration and pressure on performance of symmetric CNFs based supercapacitors. *Electrochim. Acta.* **2017**, 245, 531–538.
- [5] Zhou, G.; Xiong, T.; He, S.; Li, Y.; Zhu, Y.; Hou, H. Asymmetric supercapacitor based on flexible TiC/CNF felt supported interwoven nickel-cobalt binary hydroxide nanosheets. *J. Power Sources.* **2016**, 317, 57–64.
- [6] Dai, Z.; Ren, P. G.; He, W.; Hou, X.; Ren, F.; Zhang, Q.; Jin, Y. L. Boosting the electrochemical performance of nitrogen-oxygen co-doped carbon nanofibers based supercapacitors through esterification of lignin precursor. *Renew. Energ.* **2020**, 162, 613–623.
- [7] Shin, S.; Shin, M. W. Nickel metal–organic framework (Ni-MOF) derived NiO/C@CNF composite

for the application of high performance self-standing supercapacitor electrode. *Appl. Surf. Sci.* **2020**, 540, 148295.

[8] Sukanya, N.; Pinit, K.; Santi, M. The structural and electrochemical properties of CNF/MnFe<sub>2</sub>O<sub>4</sub> composite nanostructures for supercapacitors. *Mater. Chem. Phys.* **2018**, 220, 190–200.

[9] Sun, X.; Liu, H.; Xu, G.; Bai, J.; Li, C. Embedding Co<sub>2</sub>P nanoparticles into N&P co-doped carbon fibers for hydrogen evolution reaction and supercapacitor. *Int. J. Hydrog. Energy.* **2021**, 46, 1560–1568.

[10] Amiri, A.; Conlee, B.; Tallerine, I.; Kennedy, W. J.; Naraghi, M, A novel path towards synthesis of nitrogen-rich porous carbon nanofibers for high performance supercapacitors. *Chem. Eng. J.* **2020**, 399, 125788.

[11] Tian, D.; Lu, X.; Nie, G.; Gao, M.; Song, N.; Wang, C. Growth of polyaniline thorns on hybrid electrospun CNFs with nickel nanoparticles and graphene nanosheets as binder-free electrodes for high-performance supercapacitors. *Appl. Surf. Sci.* **2018**, 458, 389–396.

[12] Ghanashyam, G.; Jeong, H. K. Synthesis of nitrogen-doped plasma treated carbon nanofiber as an efficient electrode for symmetric supercapacitor. *J. Energy. Storage.* **2021**, 33, 102150.

[13] Anand, S.; Ahmad, M. W.; Saidi, A. K. A. A.; Yang, D.; Choudhury, A. Polyaniline nanofiber decorated carbon nanofiber hybrid mat for flexible electrochemical supercapacitor. *Mater. Chem. Phys.* **2020**, 254, 123480.

[14] Sun, W.; Gao, G.; Zhang, K.; Liu, Y.; Wu, G. Self-assembled 3D N-CNFs/V<sub>2</sub>O<sub>5</sub> aerogels with core/shell nanostructures through vacancies control and seeds growth as an outstanding supercapacitor electrode material. *Carbon.* **2018**, 132, 667–677.

[15] Tang, P.; Han, L.; Zhang, L. Facile synthesis of graphite/PEDOT/MnO<sub>2</sub> composites on commercial supercapacitor separator membranes as flexible and high-performance supercapacitor electrodes. *ACS Appl Mater Interfaces.* **2014**, 6, 10506–10515.

[16] Mansuer, M.; Miao, L.; Qin, Y.; Song, Z.; Zhu, D.; Duan, H.; Lv, Y.; Li, L.; Liu, M.; Gan, L. Trapping precursor-level functionalities in hierarchically porous carbons prepared by a pre-stabilization route for superior supercapacitors. *Chin. Chem. Lett.* 2022, 10.1016/j.ccl.2022.03.027.

[17] Du, W.; Miao, L.; Song, Z.; Zheng, X.; Lv, Y.; Zhu, D.; Gan, L.; Liu, M. Kinetics-driven design of 3D VN/MXene composite structure for superior zinc storage and charge transfer. *J. Power Sources.* 2022, 536, 231512.
